# Supplementary material for: Evaluating Brightness and Spectral Properties of Click Beetle and Firefly Luciferases Using Luciferin Analogues: Identification of Preferred Pairings of Luciferase and Substrate for In Vivo Bioluminescence Imaging
Source: PubMed Central journal article supplement (PMC7666294; doi:10.1007/s11307-020-01523-7), 2020-09-14

**a**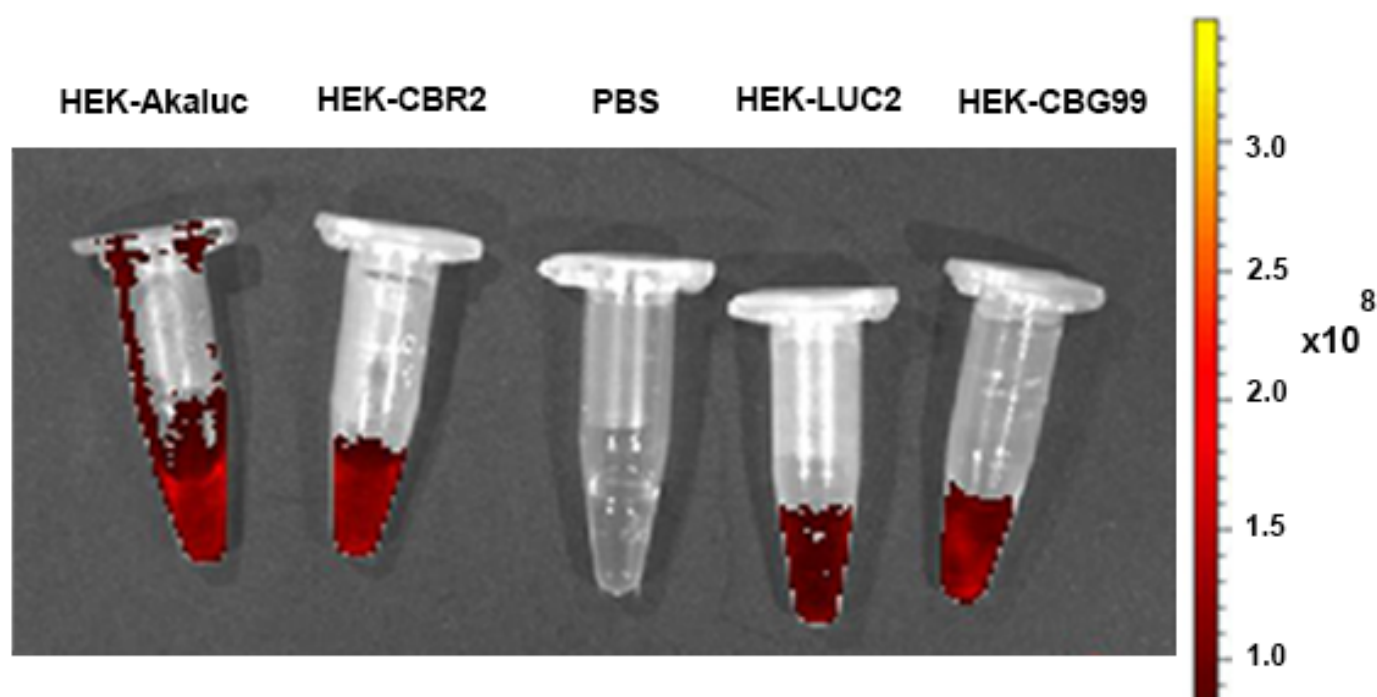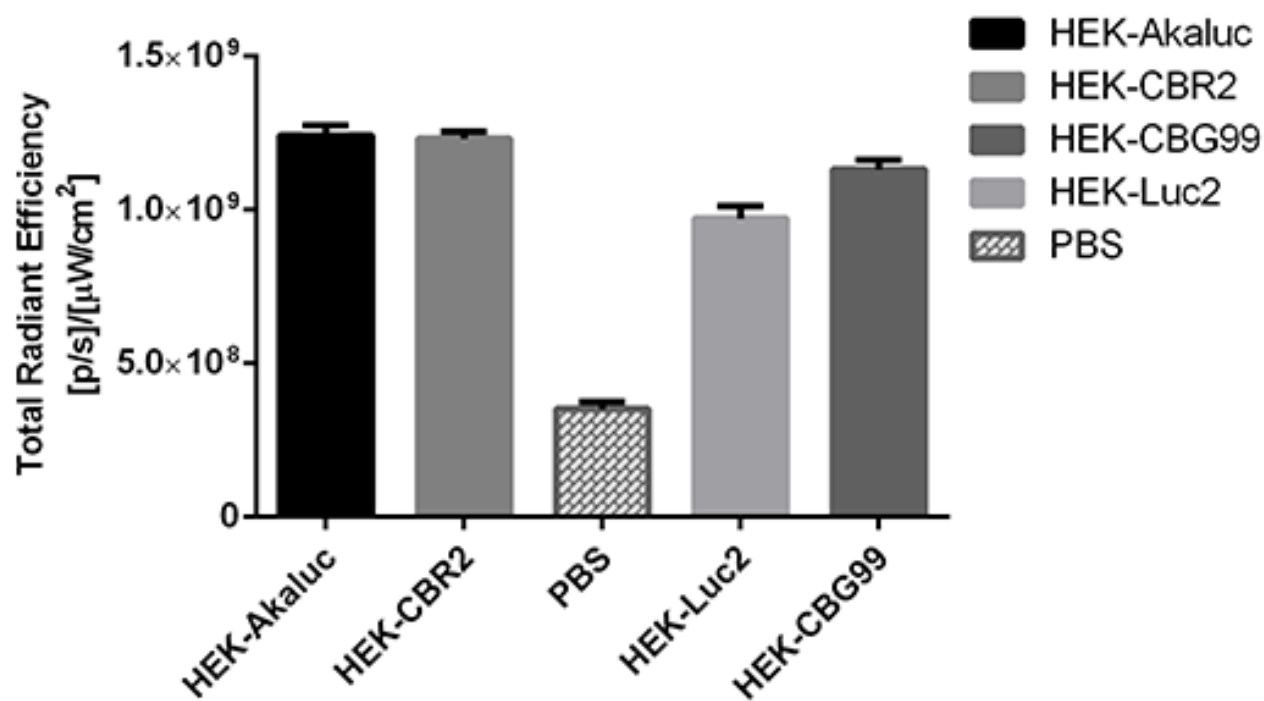

Supplement: 11307_2020_1523_MOESM1_ESM.pdf [file 11307_2020_1523_MOESM1_ESM.pdf]
